# Supplementary material for: Genome Analysis of a Verrucomicrobial Endosymbiont With a Tiny Genome Discovered in an Antarctic Lake
Source: Front Microbiol. 2021 Jun 1;12:674758. doi: 10.3389/fmicb.2021.674758 (PMC8204192; doi:10.3389/fmicb.2021.674758)
Supplement: Supplementary file 5 [file Table_7.xlsx]

## Sheet: Euplotes mitochondrial proteins
Table S7│Features of the Euplotes sp. AntOrgLke mitochondrial genome, and results from blastp against reference Euplotes spp.
Locus Tag	Type	Start Coord	End Coord	Strand	DNA Sequence Length (bp)	Amino Acid Sequence Length (aa)	Gene Product Name	E. vanleeuwenhoeki protein ID	%ID	length	mismatch	gap	q-start	q-end	s-start	s-end	E-value	bitscore	E. crassus protein ID	%ID	length	mismatch	gap	q-start	q-end	s-start	s-end	E-value	bitscore	E. minuta protein ID	%ID	length	mismatch	gap	q-start	q-end	s-start	s-end	E-value	bitscore
Ga0307966_10012061	CDS	225	1577	-	1353	450	quinol-cytochrome oxidoreductase complex cytochrome b subunit	MK889230.1_prot_QPM99237.1_1	84.944	445	67	0	1	445	1	445	0	794	GQ903131.1_prot_ACX30980.1_5	85.946	370	52	0	76	445	30	399	0	644	GQ903130.1_prot_ACX30945.1_6	85.169	445	66	0	1	445	1	445	0	746
Ga0307966_10012062	CDS	1588	2940	-	1353	450	quinol-cytochrome oxidoreductase complex cytochrome b subunit	MK889230.1_prot_QPM99237.1_1	84.944	445	67	0	1	445	1	445	0	794	GQ903131.1_prot_ACX30980.1_5	85.946	370	52	0	76	445	30	399	0	644	GQ903130.1_prot_ACX30945.1_6	85.169	445	66	0	1	445	1	445	0	746
Ga0307966_10012063	CDS	2951	4303	-	1353	450	quinol-cytochrome oxidoreductase complex cytochrome b subunit	MK889230.1_prot_QPM99237.1_1	85.618	445	64	0	1	445	1	445	0	801	GQ903131.1_prot_ACX30980.1_5	86.216	370	51	0	76	445	30	399	0	646	GQ903130.1_prot_ACX30945.1_6	85.393	445	65	0	1	445	1	445	0	752
Ga0307966_10012064	CDS	4321	4791	-	471	156	hypothetical protein												GQ903131.1_prot_ACX30981.1_6	53.846	104	42	1	40	137	7	110	5.23e-35	111	GQ903130.1_prot_ACX30946.1_7	65.385	52	18	0	79	130	1	52	5.11e-23	79.7
Ga0307966_10012065	tRNA	4786	4858	-	73		tRNA_Met_CAT
Ga0307966_10012065a	rRNA	4801	7669				23S ribosomal RNA (split)*
Ga0307966_10012066	CDS	7247	10408	-	3162	1053	heme/copper-type cytochrome/quinol oxidase subunit 2	MK889230.1_prot_QPM99239.1_3	41.22	1082	515	28	21	1053	54	1063	0	635	GQ903131.1_prot_ACX30982.1_7	38.182	605	305	16	478	1035	417	999	2.98e-100	332	GQ903130.1_prot_ACX30947.1_8	42.576	458	227	10	592	1035	560	995	7.9e-97	322
																			GQ903131.1_prot_ACX30982.1_7	44.75	400	181	11	22	409	49	420	2.49e-79	273	GQ903130.1_prot_ACX30947.1_8	44.388	392	193	7	22	409	49	419	4.74e-81	278
Ga0307966_10012067	CDS	10530	10916	-	387	128	ribosomal protein L14	MK889230.1_prot_QPM99240.1_4	50.394	127	63	0	1	127	1	127	4.13e-43	131	GQ903131.1_prot_ACX30983.1_8	43.089	123	70	0	6	128	39	161	3.28e-32	104	GQ903130.1_prot_ACX30948.1_9	41.406	128	75	0	1	128	1	128	1.6e-31	101
Ga0307966_10012068	CDS	10891	11613	-	723	240	hypothetical protein	MK889230.1_prot_QPM99241.1_5	36.559	186	107	5	49	228	50	230	2.01e-21	82												GQ903130.1_prot_ACX30949.1_10	33.772	228	132	5	3	227	990	1201	2.03e-24	93.6
Ga0307966_10012069	CDS	11656	14580	-	2925	974	heme/copper-type cytochrome/quinol oxidase subunit 1/heme/copper-type cytochrome/quinol oxidase subunit 1	MK889230.1_prot_QPM99242.1_6	67.765	971	256	16	49	970	39	1001	0	1217	GQ903131.1_prot_ACX30984.1_9	62.627	982	295	17	40	974	24	980	0	1160	GQ903130.1_prot_ACX30949.1_10	64.33	970	282	15	40	966	23	971	0	1168
Ga0307966_100120610	CDS	14891	16162	-	1272	423	hypothetical protein	MK889230.1_prot_QPM99244.1_8	46.633	401	195	7	29	417	25	418	3.89e-76	236	GQ903131.1_prot_ACX30986.1_11	61.062	226	81	2	194	415	78	300	2.48e-69	214
Ga0307966_100120611	CDS	16172	17494	-	1323	440	hypothetical protein	MK889230.1_prot_QPM99245.1_9	53.403	191	89	0	250	440	310	500	3.25e-57	189	GQ903131.1_prot_ACX30988.1_13	47.273	165	87	0	273	437	589	753	1.49e-39	143	GQ903130.1_prot_ACX30952.1_13	43.316	187	106	0	251	437	562	748	2.68e-36	134
Ga0307966_100120612	tRNA	17502	17572	-	71		tRNA_Opal_TCA
Ga0307966_100120612a	rRNA	18170	20341				16S ribosomal RNA (split)*
Ga0307966_100120613	tRNA	20221	20304	-	84		tRNA_Tyr_GTA
		20305	20529				repeats region
		21092	21288				repeats region
Ga0307966_100113323	tRNA	21019	21091	-	73		tRNA_Phe_GAA
Ga0307966_100113322	CDS	20493	20669	+	177	58	hypothetical protein
Ga0307966_100113321	tRNA	20360	20431	-	72		tRNA_Glu_TTC
Ga0307966_100113320	CDS	19875	20354	-	480	159	hypothetical protein	MK889230.1_prot_QPM99248.1_12	25.234	107	72	4	1	101	1	105	9.22e-05	33.1	GQ903131.1_prot_ACX30991.1_16	30	110	51	4	21	120	59	152	1.48e-05	35.4
Ga0307966_100113319	CDS	18071	19873	-	1803	600	hypothetical protein	MK889230.1_prot_QPM99250.1_14	30.46	348	212	11	208	537	160	495	1.71e-19	84
Ga0307966_100113318	CDS	16049	17581	-	1533	510	NADH:ubiquinone oxidoreductase subunit 4 (subunit M)	MK889230.1_prot_QPM99252.1_16	57.107	394	167	1	109	502	70	461	5.13e-124	364	GQ903131.1_prot_ACX30996.1_21	54.847	392	176	1	118	508	89	480	1.94e-124	365	GQ903130.1_prot_ACX30958.1_19	50.913	438	213	1	71	508	48	483	3.59e-138	400
Ga0307966_100113317	CDS	15579	16037	-	459	152	small subunit ribosomal protein S12	MK889230.1_prot_QPM99253.1_17	59.259	135	55	0	17	151	3	137	1.47e-54	161	GQ903131.1_prot_ACX30997.1_22	63.433	134	49	0	17	150	22	155	9.58e-59	172	GQ903130.1_prot_ACX30959.1_20	63.433	134	49	0	17	150	28	161	1.09e-59	175
Ga0307966_100113316	CDS	15058	15333	-	276	91	NADH-quinone oxidoreductase subunit B	MK889230.1_prot_QPM99254.1_18	90.11	91	9	0	1	91	74	164	1.1e-61	177	GQ903131.1_prot_ACX30998.1_23	84.615	91	14	0	1	91	73	163	2.04e-59	172	GQ903130.1_prot_ACX30960.1_21	83.516	91	15	0	1	91	77	167	9.31e-59	170
Ga0307966_100113315	CDS	14231	15082	-	852	283	hypothetical protein
Ga0307966_100113314	CDS	13428	14171	-	744	247	ribosomal protein L2	MK889230.1_prot_QPM99256.1_20	36.842	247	151	4	3	246	20	264	2.29e-42	138	GQ903131.1_prot_ACX31000.1_25	32.174	230	136	4	25	240	53	276	8.85e-27	97.4	GQ903130.1_prot_ACX30962.1_23	33.191	235	139	5	25	246	45	274	1.36e-27	99.8
Ga0307966_100113313	CDS	12688	13137	-	450	149	hypothetical protein	MK889230.1_prot_QPM99258.1_22	38.65	163	83	4	1	149	1	160	1.02e-32	106	GQ903131.1_prot_ACX31001.1_26	27.907	129	84	2	1	122	2	128	3.11e-11	50.8	GQ903130.1_prot_ACX30964.1_25	30.612	147	90	4	1	140	1	142	5.72e-17	65.9
Ga0307966_100113312	CDS	11101	12672	-	1572	523	hypothetical protein	MK889230.1_prot_QPM99259.1_23	42.157	204	115	1	322	522	399	602	9.95e-38	139	GQ903131.1_prot_ACX31003.1_28	32.787	305	169	6	248	522	92	390	3.18e-32	120	GQ903130.1_prot_ACX30965.1_26	27.455	499	295	14	65	523	54	525	3.21e-23	94.7
Ga0307966_100113311	CDS	9816	10997	-	1182	393	NADH dehydrogenase (ubiquinone) Fe-S protein 2	MK889230.1_prot_QPM99260.1_24	70.762	407	105	2	1	393	8	414	0	604	GQ903131.1_prot_ACX31004.1_29	71.178	399	109	2	1	393	63	461	0	585	GQ903130.1_prot_ACX30966.1_27	70.426	399	112	2	1	393	46	444	0	583
Ga0307966_100113310	tRNA	8792	8864	-	73		tRNA_Gln_TTG
Ga0307966_10011339	CDS	7205	8254	-	1050	349	hypothetical protein	MK889230.1_prot_QPM99264.1_28	54.206	321	147	0	24	344	29	349	1.84e-103	301												GQ903130.1_prot_ACX30970.1_31	50.333	300	149	0	43	342	78	377	5.21e-77	234
Ga0307966_10011338	CDS	6967	7194	-	228	75	F0F1-type ATP synthase membrane subunit c/vacuolar-type H+-ATPase subunit K	MK889230.1_prot_QPM99265.1_29	93.333	75	5	0	1	75	1	75	3.62e-47	137												GQ903130.1_prot_ACX30971.1_32	97.333	75	2	0	1	75	1	75	5.85e-48	139
Ga0307966_10011337	CDS	5777	6964	-	1188	395	hypothetical protein	MK889230.1_prot_QPM99266.1_30	38.194	144	87	1	7	148	2	145	1.04e-24	92.8												GQ903130.1_prot_ACX30972.1_33	32.456	114	76	1	10	123	8	120	2.07e-12	57.8
								MK889230.1_prot_QPM99267.1_31	34.5	200	109	5	197	383	6	196	2.86e-23	89												GQ903130.1_prot_ACX30973.1_34	32.53	166	97	6	177	336	13	169	1.69e-11	54.7
Ga0307966_10011336	CDS	5229	5762	-	534	177	hypothetical protein	MK889230.1_prot_QPM99268.1_32	44.048	168	93	1	11	177	15	182	1.77e-37	120
Ga0307966_10011335	tRNA	4566	4638	-	73		tRNA_His_GTG
Ga0307966_10011334	CDS	4203	4565	-	363	120	hypothetical protein
Ga0307966_10011333	CDS	3129	3959	-	831	276	NADH-quinone oxidoreductase subunit H	MK889230.1_prot_QPM99272.1_36	79.116	249	52	0	8	256	1	249	9.79e-148	407												GQ903130.1_prot_ACX30975.1_36	74.231	260	67	0	6	265	13	272	5.82e-140	388
Ga0307966_10011332	CDS	1659	2906	-	1248	415	hypothetical protein	MK889230.1_prot_QPM99274.1_38	30.851	94	63	2	63	156	109	200	7.91e-07	42.7	GQ903131.1_prot_ACX30979.1_4	40	110	61	3	63	170	89	195	8.99e-09	47.8	GQ903130.1_prot_ACX30944.1_5	33.835	133	75	6	67	195	148	271	2.78e-07	43.9
Ga0307966_10011331	CDS	104	1669	-	1566	521	hypothetical protein	MK889230.1_prot_QPM99275.1_39	41.398	186	107	1	1	184	1	186	1.3e-35	131	GQ903131.1_prot_ACX30977.1_2	35.455	110	68	2	3	111	12	119	1e-12	61.6	GQ903130.1_prot_ACX30943.1_4	33.858	127	81	2	3	128	16	140	4.2e-12	56.6
* rRNA gene regions were located by blastn against NCBI nr. Identification as split genes is on the basis of homology to the split rRNA genes of reference Euplotes spp.
All other mitochondrial genome features were predicted by the IMG annotation pipline.
Contigs Ga0307966_1001206 and Ga0307966_1001133 (Both from IMG Metagenome ID 3300031607) can be accessed at https://img.jgi.doe.gov.
